# Supplementary material for: Functional role of PGAM5 multimeric assemblies and their polymerization into filaments
Source: PubMed Central journal article supplement (PMC6355839; doi:10.1038/s41467-019-08393-w), 2019-01-31
Supplement: 41467_2019_8393_MOESM1_ESM.pdf [file 41467_2019_8393_MOESM1_ESM.pdf]

## **Supplementary Information**

### **Functional role of PGAM5 multimeric assemblies and their polymerization into filaments**

Karen Ruiz<sup>1,\*</sup>, Tarjani M. Thaker<sup>1,\*</sup>, Christopher Agnew<sup>1</sup>, Lakshmi Miller-Vedam<sup>2</sup>, Raphael Trenker<sup>1</sup>, Clara Herrera<sup>3</sup>, Maria Ingaramo<sup>4</sup>, Daniel Toso<sup>5</sup>, Adam Frost<sup>2,5,6</sup>, Natalia Jura<sup>1,7,\*\*</sup>

\* These authors contributed equally to this work

\*\* Correspondence should be addressed to N.J.

555 Mission Bay Blvd S, Rm 452W

San Francisco, CA 94158

Phone: 415-514-1133

Email: [natalia.jura@ucsf.edu](mailto:natalia.jura@ucsf.edu)

# Supplementary Figure 1

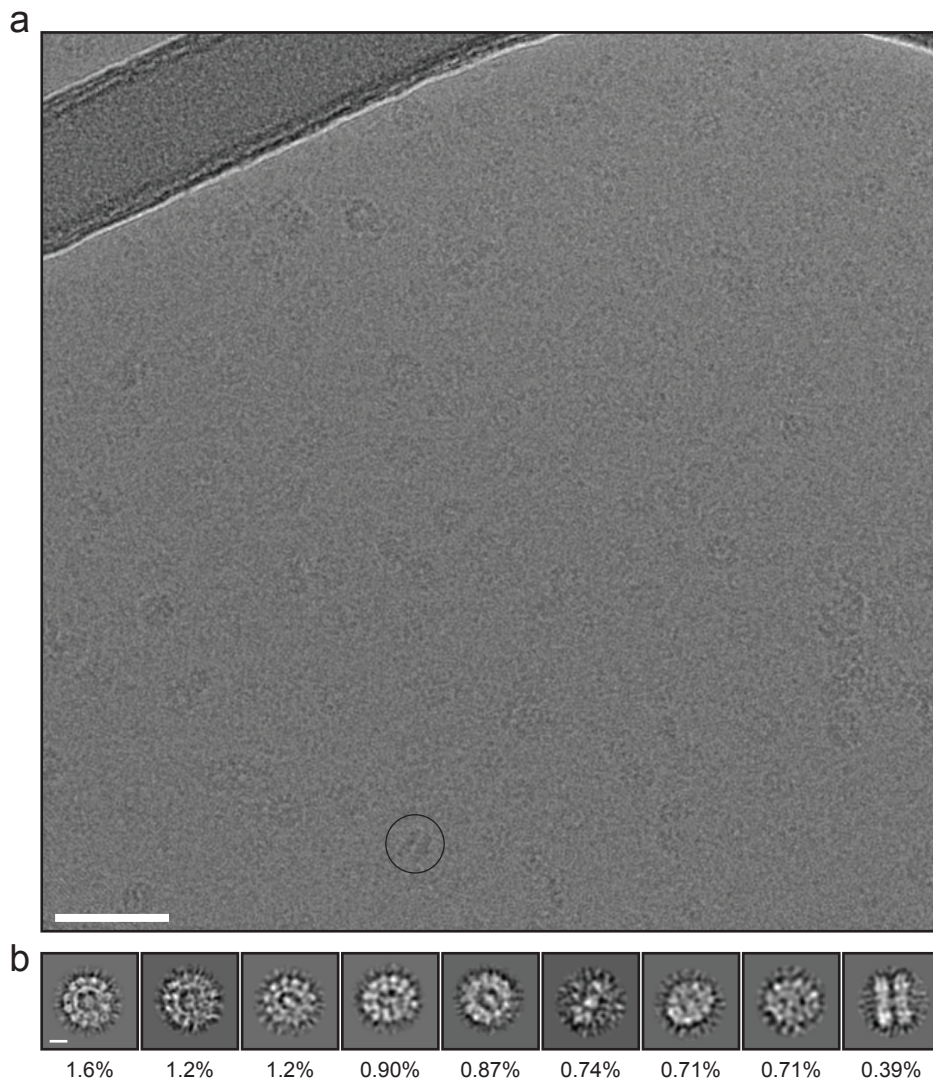

**Supplementary Figure 1. Representative electron cryo-micrograph and 2D class averages of  $\Delta 48$  PGAM5 dodecamer side views.** **a**, Representative raw micrograph image of  $\Delta 48$  PGAM5, with a representative side view of a dodecamer doublet circled on the image. **b**, Approximately 8.3% of the total number of particles picked from 6,543 micrographs corresponded to orientations other than the C6 symmetry 'top' view of the dodecamer and were subject to iterative rounds of 2D-classification into 9 classes as described in the methods section of the main text, revealing a single class in which the side view of a doublet of dodecamers stacked on the apparent planar face of the assembly (class 9 comprised of 542 particles) is observed. The scale bar in (b) corresponds to 5 nm.

# Supplementary Figure 2

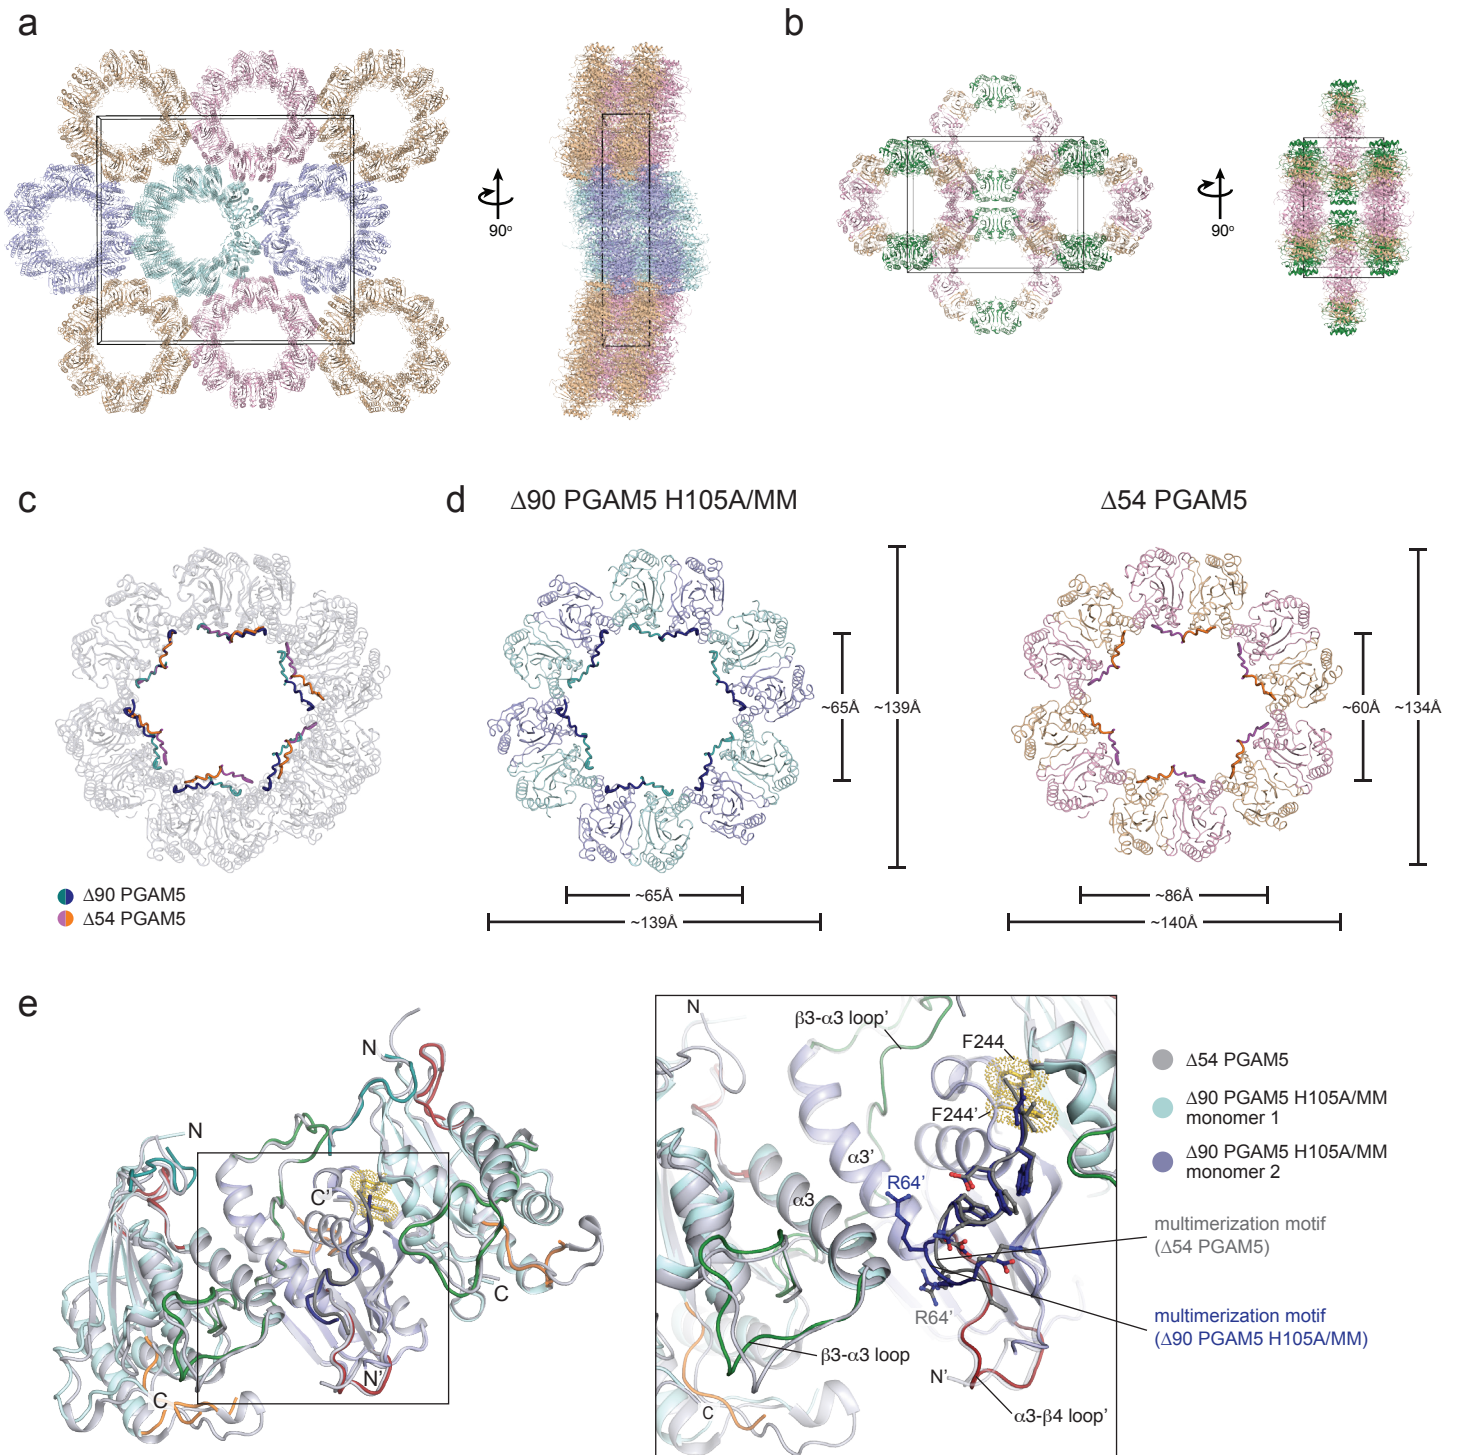

**Supplementary Figure 2: Overview of dodecamer geometry in  $\Delta 90$  PGAM5 H105A/MM compared to  $\Delta 54$  PGAM5.** Comparison of crystal packing in the structures of **a**,  $\Delta 90$  PGAM5 H105A/MM and **b**,  $\Delta 54$  PGAM5 (PDB: 5MUF). Molecules related by symmetry are colored the same in the respective lattices. **c**, Overlay of the dodecameric assemblies of  $\Delta 90$  PGAM5 H105A/MM and  $\Delta 54$  PGAM5, highlighting the differences in the geometry of the dodecamer lumen. **d**, Comparison of dodecamer dimensions in  $\Delta 90$  PGAM5 H105A/MM (left panel) and  $\Delta 54$  PGAM5 (right panel). **e**, Differences in the dimerization interface mediated by the  $\alpha 3$  helices of two adjacent phosphatase domains are highlighted in the structures of  $\Delta 54$  PGAM5 (grey) and  $\Delta 90$  PGAM5 H105A/MM colored using the same color scheme as shown in Fig. 2 (monomer 1 in cyan; monomer 2 in light blue). A detailed view of the interface and residues within the multimerization motifs in the monomer 1 in both structures are shown as stick representation in the panel on the right.

Supplementary Figure 3

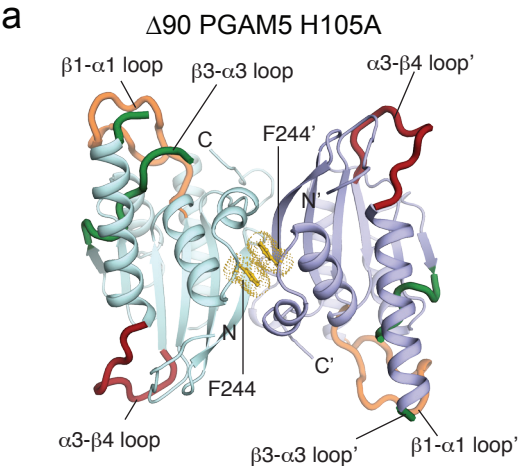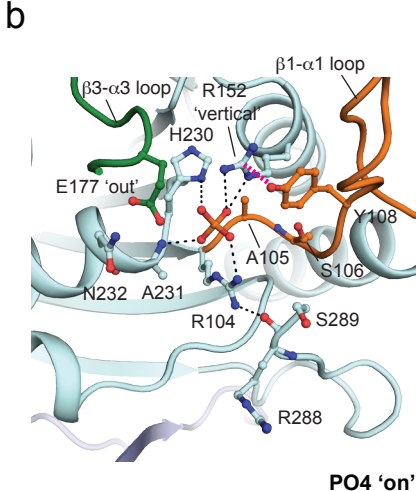

**Supplementary Figure 3: Active site in the crystal structure of the  $\Delta 90$  PGAM5 H105A phosphatase.** **a**, The cartoon representation of the crystal structure of the  $\Delta 90$  PGAM5 H105A phosphatase is shown using the same color assignment as in Fig. 3, with monomers 1 and 2 shown in cyan and light blue, respectively. The  $\beta 1$ - $\alpha 1$  loops are colored in orange, the  $\beta 3$ - $\alpha 3$  loops are colored in green, the  $\alpha 3$ - $\beta 4$  loops are colored in red. The F244 residues in the constitutive dimer interface are colored in yellow. **b**, Detailed view of the residue positions in the active site in the crystal structure of the  $\Delta 90$  PGAM5 H105A phosphatase depicting the coordination of a phosphate ion (PO4 'on').

# Supplementary Figure 4

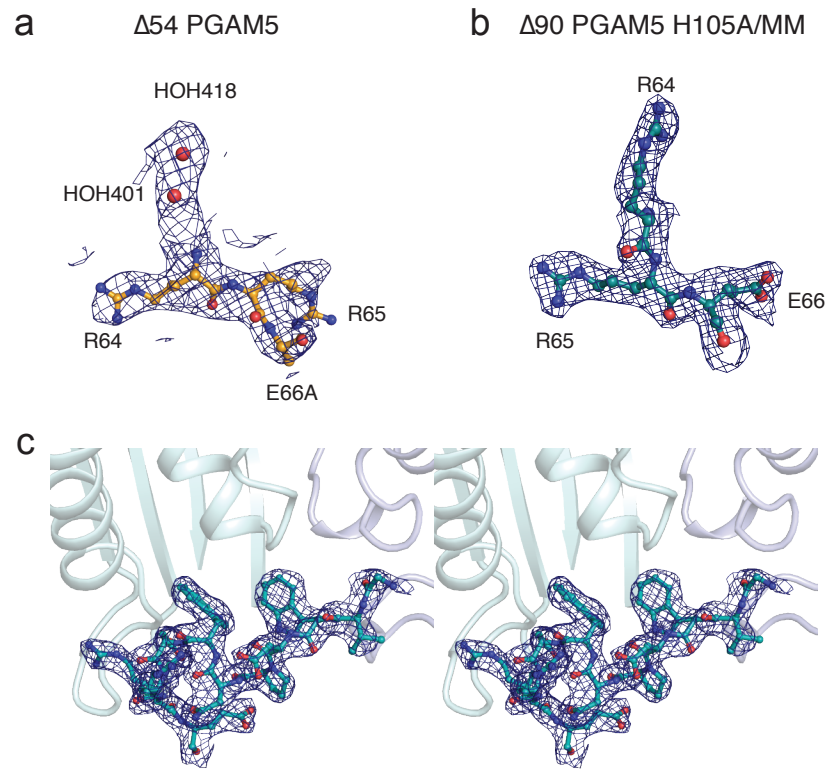



**Supplementary Figure 4: Multimerization motif residue register and corresponding electron density.** Differences in the electron density ( $2F_o-F_c$  maps contoured to  $1\sigma$ ), and subsequent amino acid assignment, of the multimerization motif region (residues 64 – 66) interacting with the phosphatase domain in **a**,  $\Delta 54$  PGAM5 (PDB: 5MUF) and **b**,  $\Delta 90$  PGAM5 H105A/MM. c) Stereo representation of the multimerization motif peptide (teal) associated with monomer 1 (cyan) in  $\Delta 90$  PGAM5 H105A/MM, with corresponding  $2F_o-F_c$  electron density contoured to  $1.0\sigma$ .

# Supplementary Figure 5

**a**

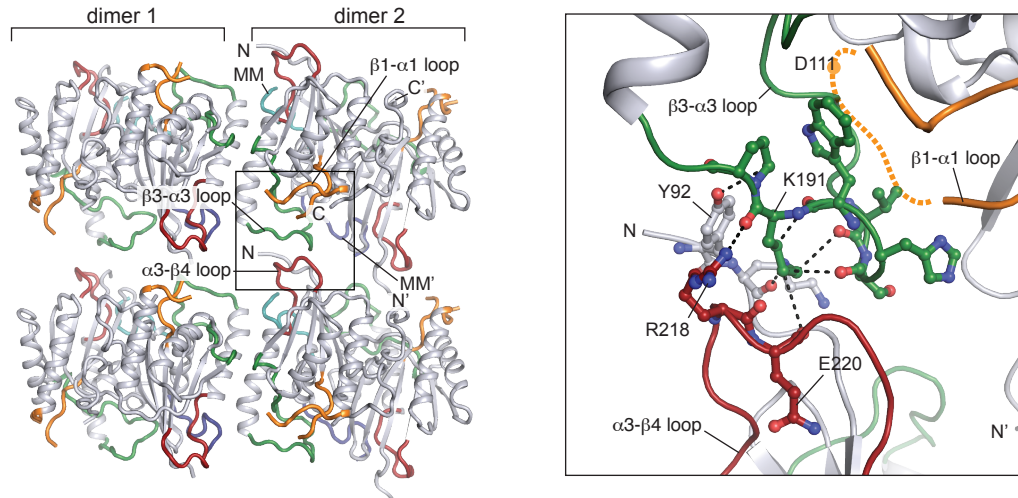

**b**

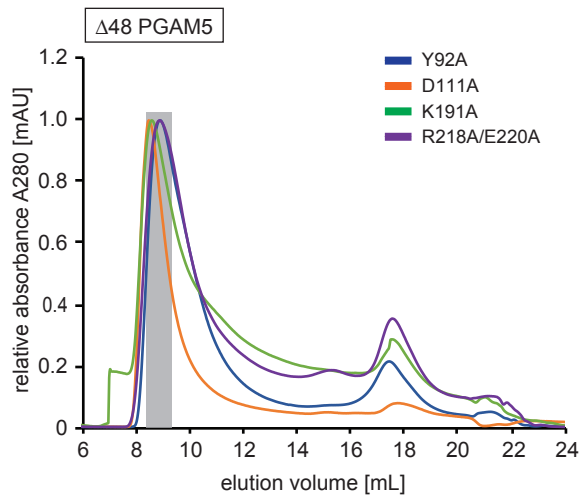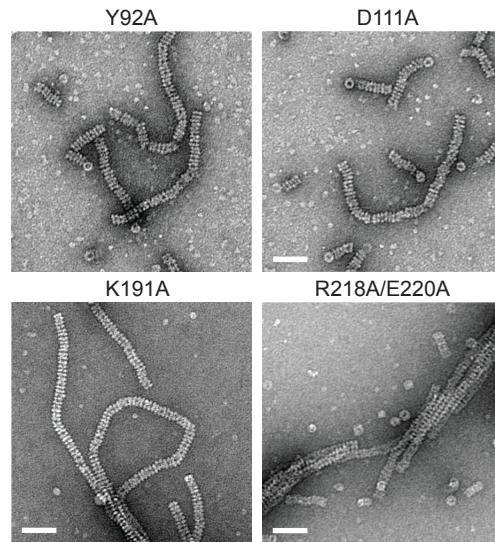

**Supplementary Figure 5: Effect of mutations in the residues making direct contact at the crystallographic dodecamer stacking interface.** **a**, Overview of the stacking interface between adjacent rings in the crystalline lattice of the  $\Delta 90$  PGAM5 H105A/MM structure (left panel). Residues forming hydrogen bonding interactions at contact sites between rings are highlighted in the right panel. **b**, Elution profiles for  $\Delta 48$  PGAM5 constructs carrying the indicated mutations of residues identified in (a) and purified by size exclusion chromatography (SEC) using a Superose 6 column (GE Healthcare) in buffer containing 150 mM NaCl. EM micrographs of negatively-stained samples of the PGAM5 mutants taken directly from the oligomer peaks observed during SEC runs are shown to the right.

# Supplementary Figure 6

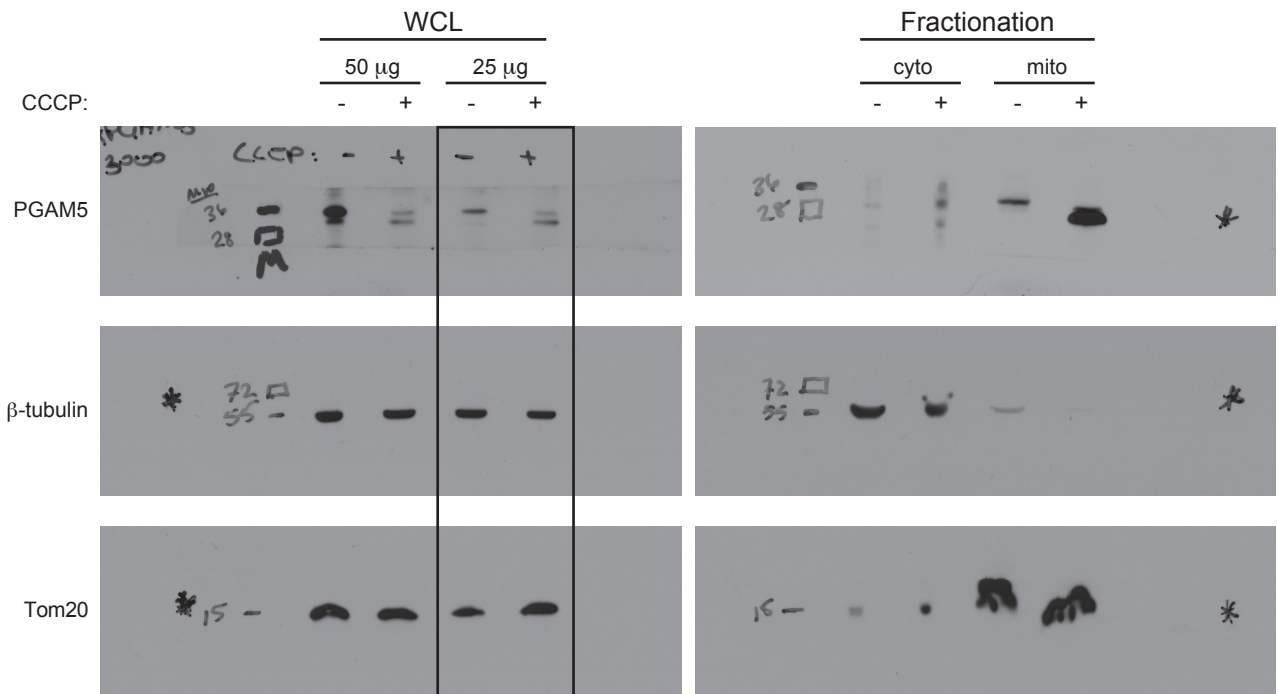

**Supplementary Figure 6: Cleaved PGAM5 forms oligomers in cells.** Uncropped blots corresponding to the data presented in Fig. 6a, showing the immunodetection of endogenous PGAM5 with anti-PGAM5 antibody,  $\beta$ -tubulin with anti- $\beta$ -tubulin antibody, and Tom20 with anti-Tom20 antibody in HEK293T whole cell lysates (WCL), and in mitochondrial (mito), and cytoplasmic (cyto) fractions, 4 hours post CCCP treatment. WCL samples correspond to 25  $\mu$ g of total protein loaded in each lane.

Supplementary Figure 7

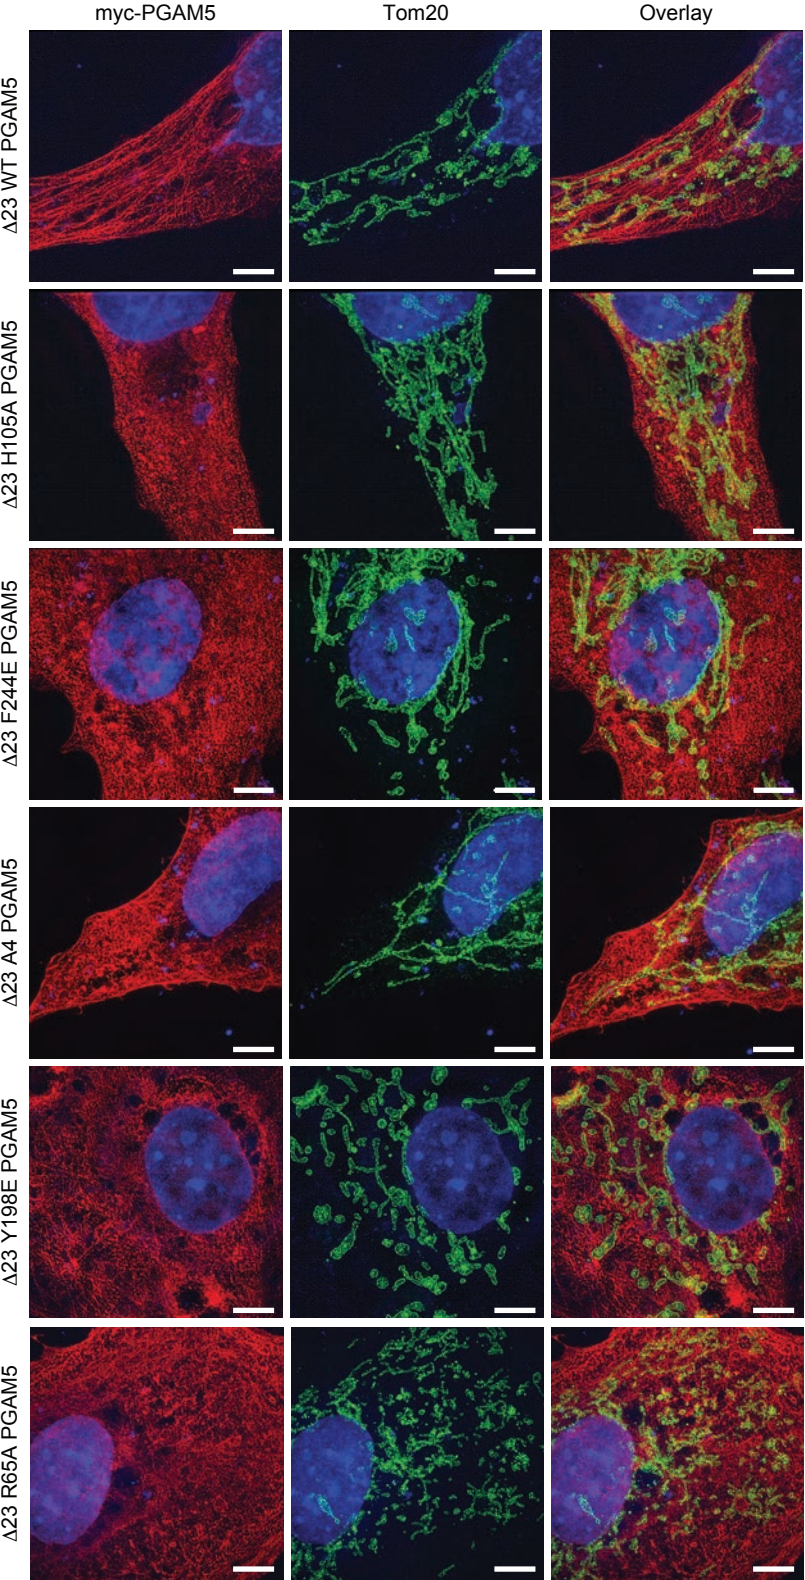

**Supplementary Figure 7: Effect of dimerization interface mutations on PGAM5 filamentation.** Representative structured illumination microscopy (SIM) images of COS7 cells transiently transfected with the myc-tagged  $\Delta 23$  PGAM5 wild type (WT) and mutant variants. COS7 cells were immunostained for Tom20 with anti-Tom20 antibody (green), for PGAM5 with anti-myc antibody (red) and with DAPI (blue). All scale bars correspond to 10  $\mu\text{m}$ .

# Supplementary Figure 8

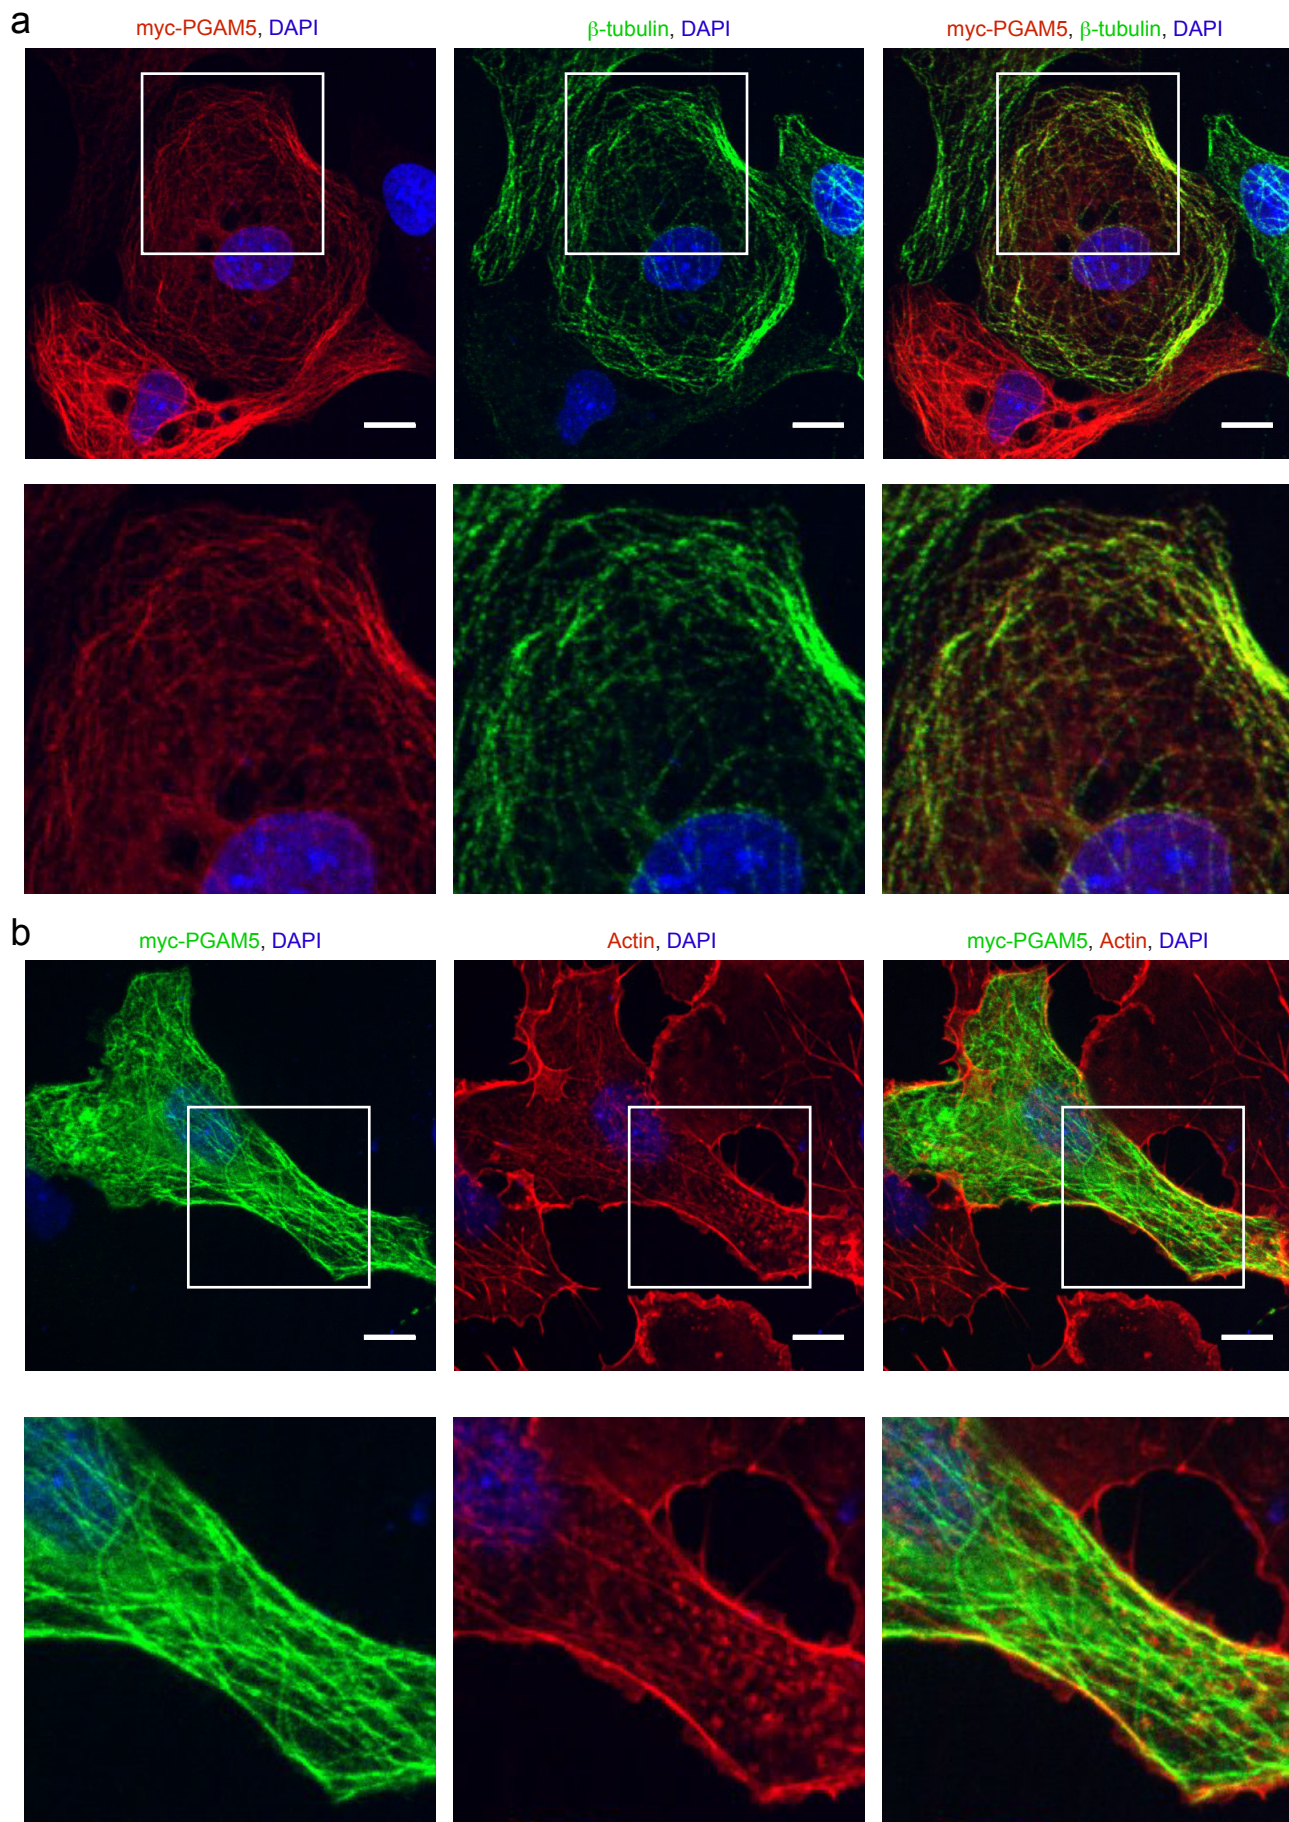



**Supplementary Figure 8: Colocalization of PGAM5 filaments with cytoskeletal structures.** **a-b**, Representative confocal images of COS7 cells transiently transfected with the myc-tagged  $\Delta 23$  PGAM5 construct. **a**, COS7 cells were immunostained for microtubules with anti- $\beta$  tubulin antibody (green), for PGAM5 with anti-myc antibody (red), and with DAPI (blue). **b**, COS7 cells were immunostained for actin with Alexa Fluor-647-phalloidin (red), for PGAM5 with anti-myc antibody (green) and with DAPI (blue). All scale bars correspond to 10  $\mu$ m.

# Supplementary Figure 9

a

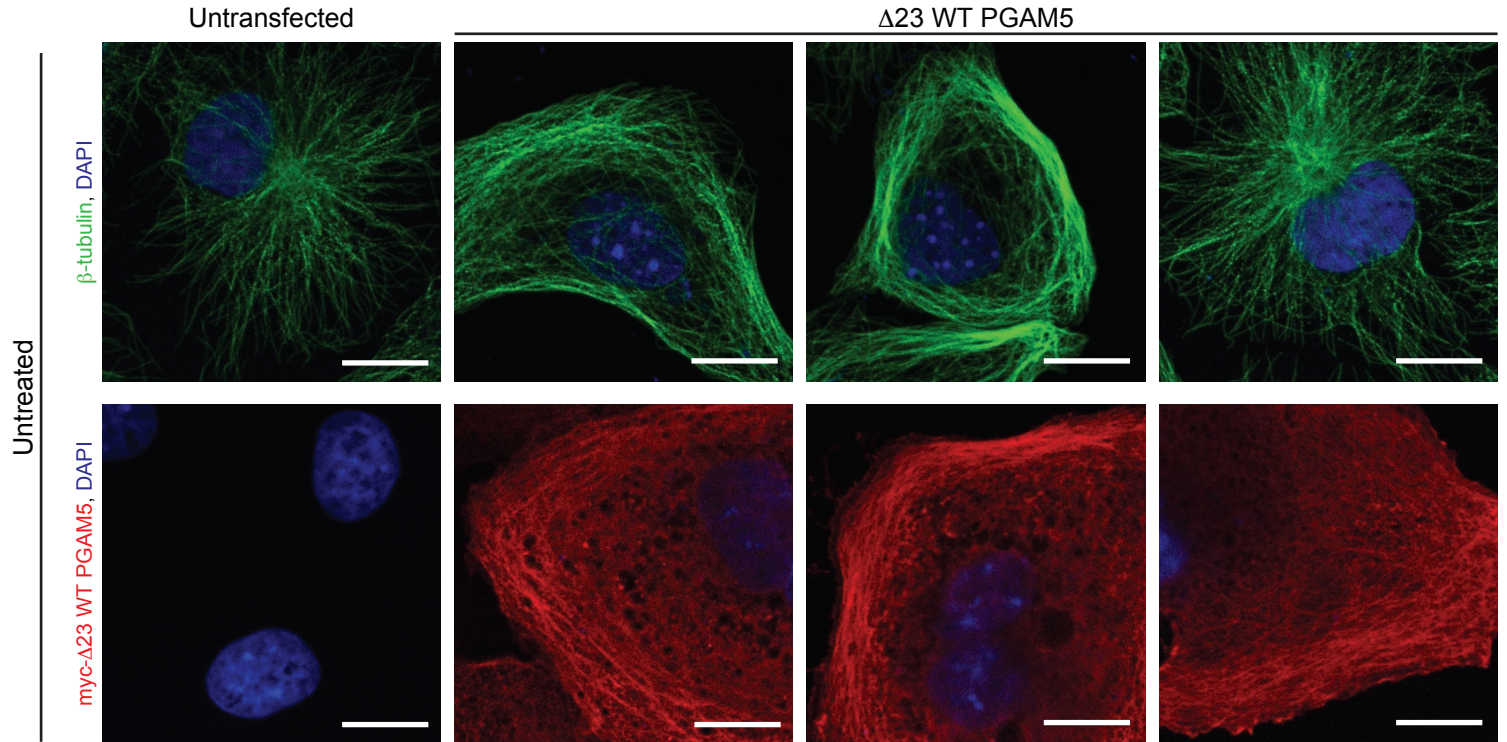

b

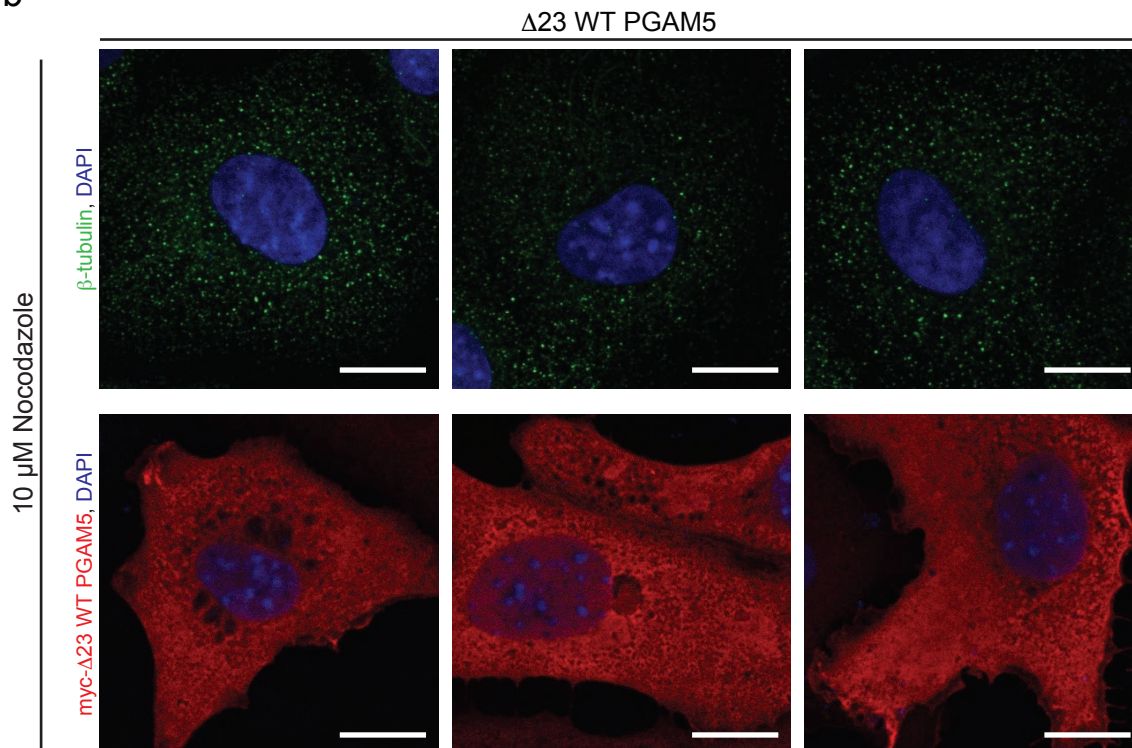

**Supplementary Figure 9: Effect of nocodazole treatment on PGAM5 filaments. a-b,** Representative confocal images of COS7 cells transiently transfected with myc-tagged  $\Delta 23$  PGAM5. **a,** Untreated COS7 cells, either untransfected or transfected with the myc-tagged  $\Delta 23$  PGAM5 wild type (WT). Upper panel: staining for  $\beta$ -tubulin with anti- $\beta$ -tubulin antibody (green) and with DAPI (blue). Lower panel: staining for PGAM5 with anti-myc antibody (red) and with DAPI (blue). **b,** COS7 cells transfected with the myc-tagged  $\Delta 23$  PGAM5 wild type (WT) treated with 10  $\mu$ M Nocodazole for 45 minutes. Upper panel: staining for  $\beta$ -tubulin with anti- $\beta$ -tubulin antibody (green) and with DAPI (blue). Lower panel shows a different set of cells stained for PGAM5 with anti-myc antibody (red) and with DAPI (blue). All scale bars correspond to 15  $\mu$ m.

Supplementary Figure 10

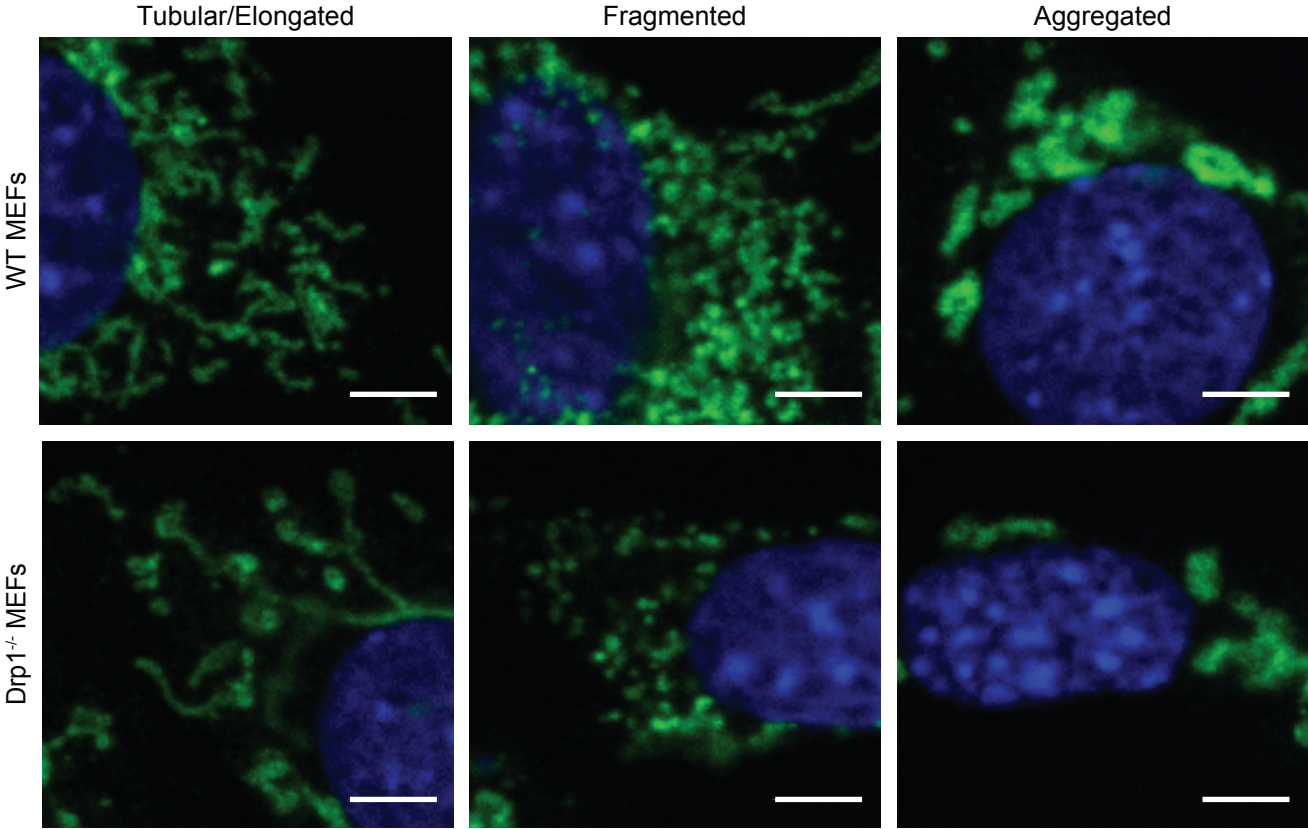

**Supplementary Figure 10: Phenotypic categories used for scoring the effect of PGAM5 overexpression on mitochondrial morphology in MEF cells.** Representative confocal images of the mitochondria in: untransfected wild type and Drp1<sup>-/-</sup> MEFs (left panels); wild type and Drp1<sup>-/-</sup> MEFs transiently transfected with full-length wild type PGAM5 (center panels) or wild type and Drp1<sup>-/-</sup> MEFs transiently transfected with full-length F244E PGAM5 (right panels). Cells were immunostained for Tom20 with anti-Tom20 antibody (green) and with DAPI (blue). All scale bars correspond to 15  $\mu$ m.

# Supplementary Figure 11

**a**

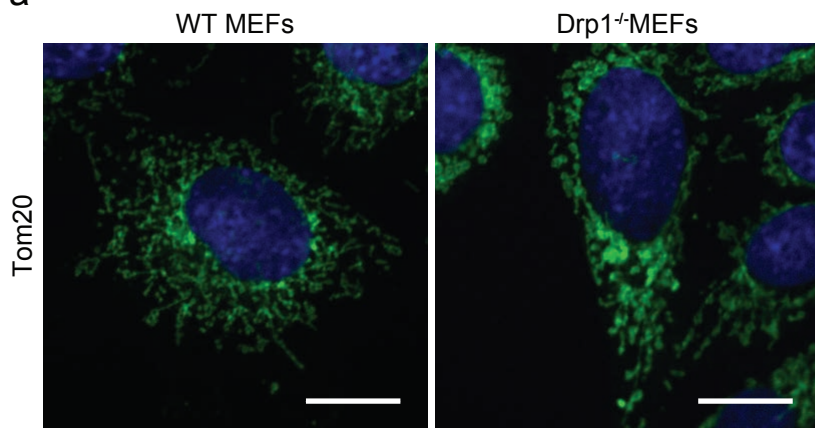

**b**

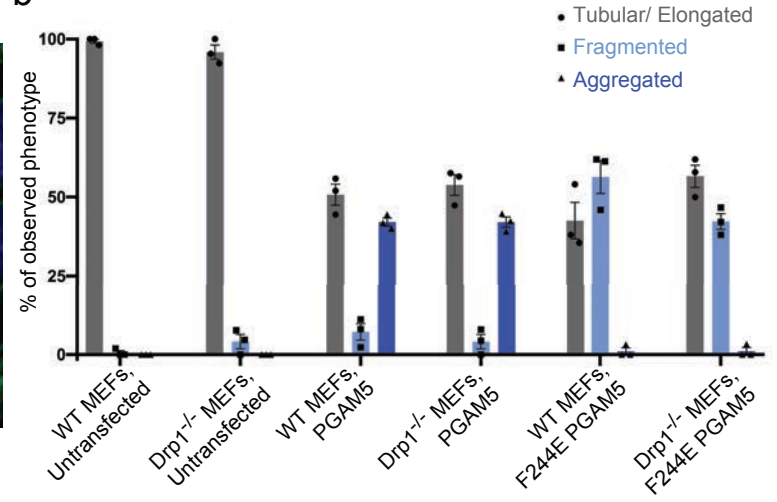

**c**

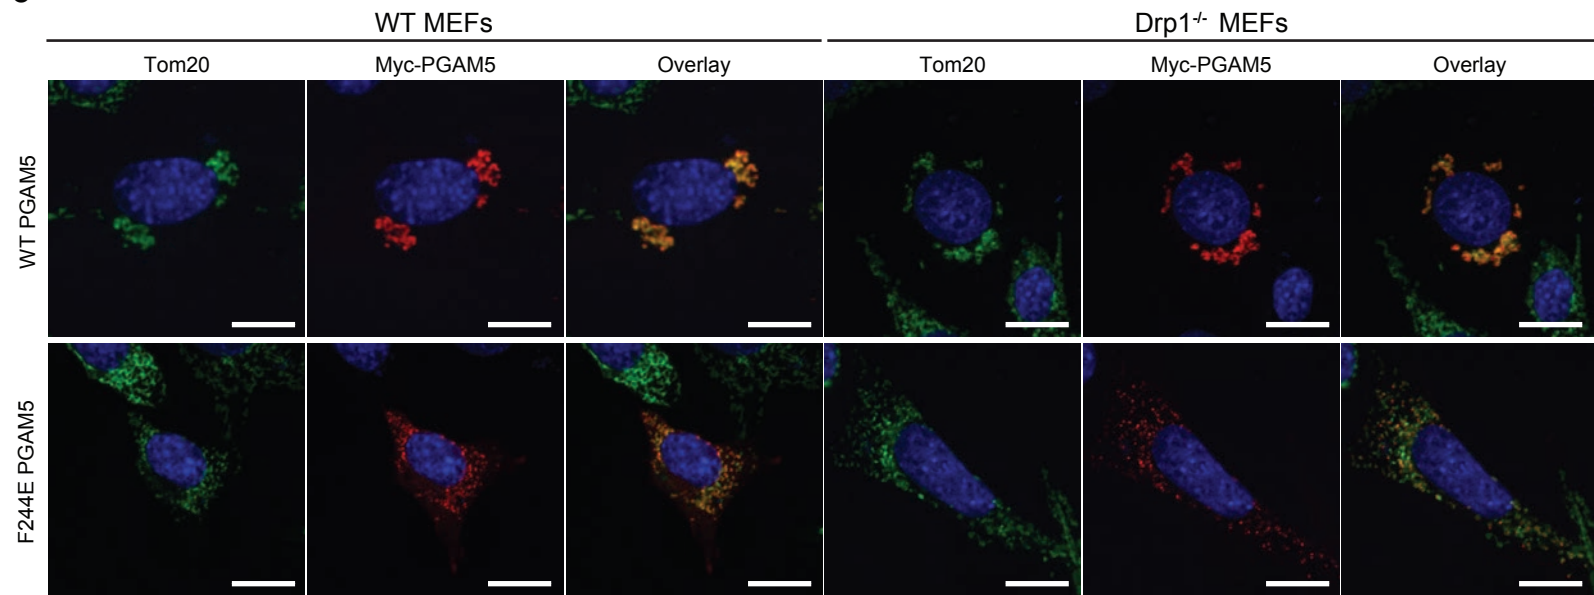

**Supplementary Figure 11: DRP1 is dispensable for the clustered mitochondrial morphology induced by PGAM5.**

**a**, Representative confocal images of wild type or Drp1<sup>-/-</sup> MEFs immunostained for the OMM marker Tom20 with anti-Tom20 antibody (green) and with DAPI (blue). Scale bars correspond to 15  $\mu$ m. **b**, Quantification of mitochondrial phenotypes observed by confocal microscopy in wild type or Drp1<sup>-/-</sup> MEFs either untransfected or transiently transfected with the indicated PGAM5 constructs, based on at least 3 independent experiments per construct. Data are represented as mean  $\pm$  S.E.M, determined using GraphPad Prism. Untransfected wild type (WT) MEFs: n= 123 cells over 3 experimental replicates. WT MEFs expressing full-length WT PGAM5: n= 129 cells over 3 experimental replicates. WT MEFs expressing full-length F244E PGAM5: n= 89 cells over 3 experimental replicates. Untransfected Drp1<sup>-/-</sup> MEFs: n= 154 cells over 3 experimental replicates. Drp1<sup>-/-</sup> MEFs expressing full-length WT PGAM5: n= 1179 cells over 3 experimental replicates. Drp1<sup>-/-</sup> MEFs expressing F244E PGAM5: n= 89 cells over 3 experimental replicates. **c**, Representative confocal images of WT or Drp1<sup>-/-</sup> MEFs transiently transfected with the WT or dimer interface mutant (F244E) full-length myc-tagged PGAM5 and immunostained for the OMM marker Tom20 with anti-Tom20 antibody (green), for PGAM5 with anti-myc antibody (red) and with DAPI (blue). All scale bars correspond to 15  $\mu$ m.

**Supplementary Table 1. Cryo-EM data collection, refinement and validation statistics**

---

|                                                     | $\Delta 48$ PGAM5 |
|-----------------------------------------------------|-------------------|
| <b>Data collection and processing</b>               |                   |
| Magnification                                       | 22,500            |
| Voltage (kV)                                        | 300               |
| Electron exposure (e <sup>-</sup> /Å <sup>2</sup> ) | 1.8               |
| Defocus range (μm)                                  | -1.0 – 2.5        |
| Pixel size (Å)                                      | 0.53              |
| Initial particle images (no.)                       | 131,396           |
| Final particle images (no.)                         | 22,422            |

---
